# Supplementary material for: Gene Therapy via Trans-Splicing for LMNA-Related Congenital Muscular Dystrophy
Source: PubMed Central journal article supplement — Mol Ther Nucleic Acids. 2018 Feb 1;10:376–86. doi: 10.1016/j.omtn.2017.12.012 (PMC5862133; doi:10.1016/j.omtn.2017.12.012), 2018-02-01
Supplement: mmc1.pdf [file mmc1.pdf]

OMTN, Volume 10

## Supplemental Information

### Gene Therapy via *Trans*-Splicing for *LMNA*-Related Congenital Muscular Dystrophy

Feriel Azibani, Astrid Brull, Ludovic Arandel, Maud Beuvin, Isabelle Nelson, Arnaud Jollet, Esma Ziat, Bernard Prudhon, Sofia Benkhelifa-Ziyyat, Marc Bitoun, Stéphanie Lorain, Gisèle Bonne, and Anne T. Bertrand

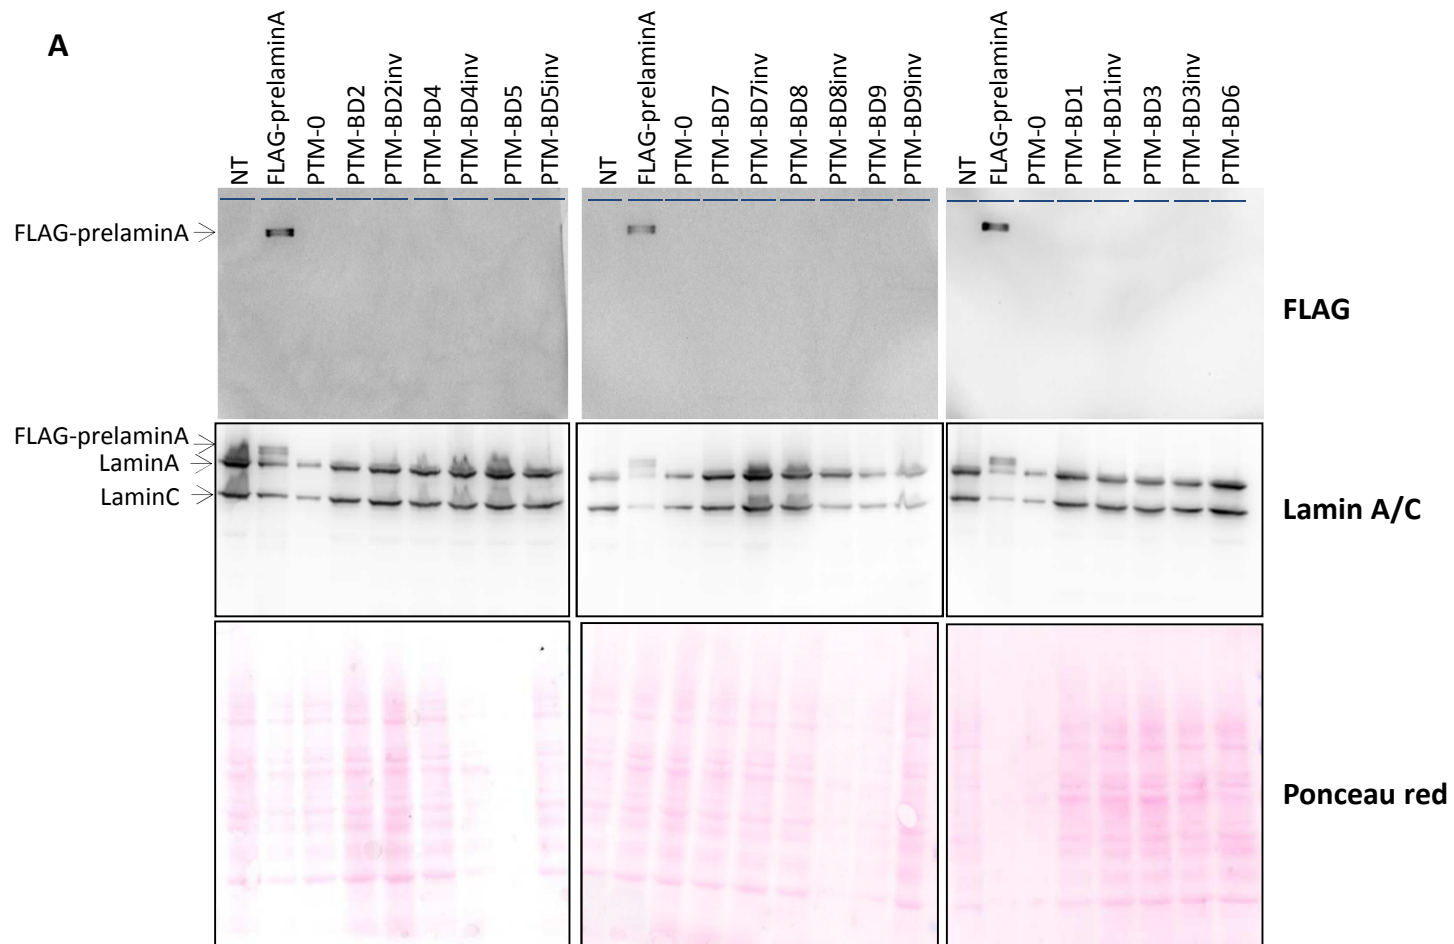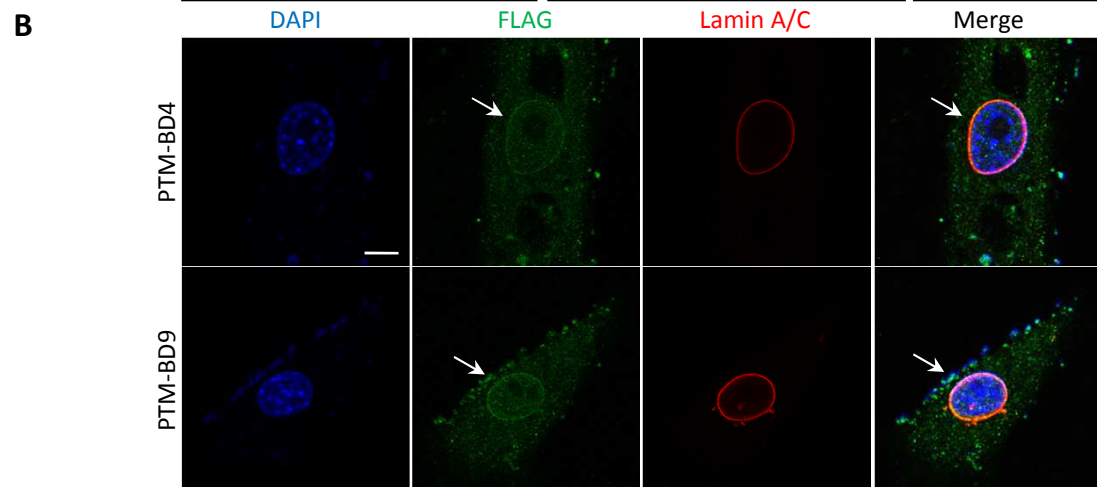

DAPI

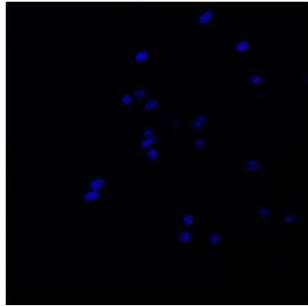

GFP

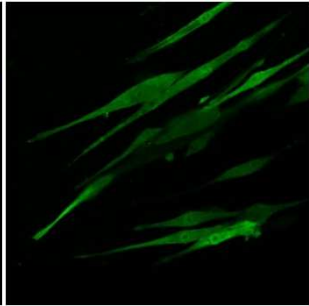

Desmin

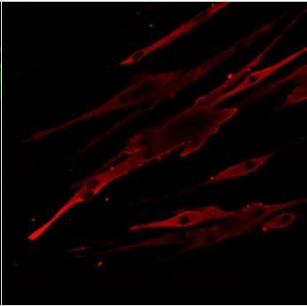

Merge

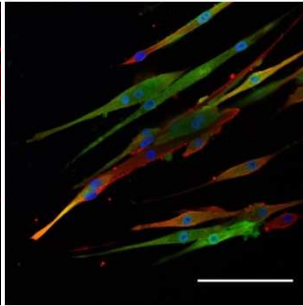

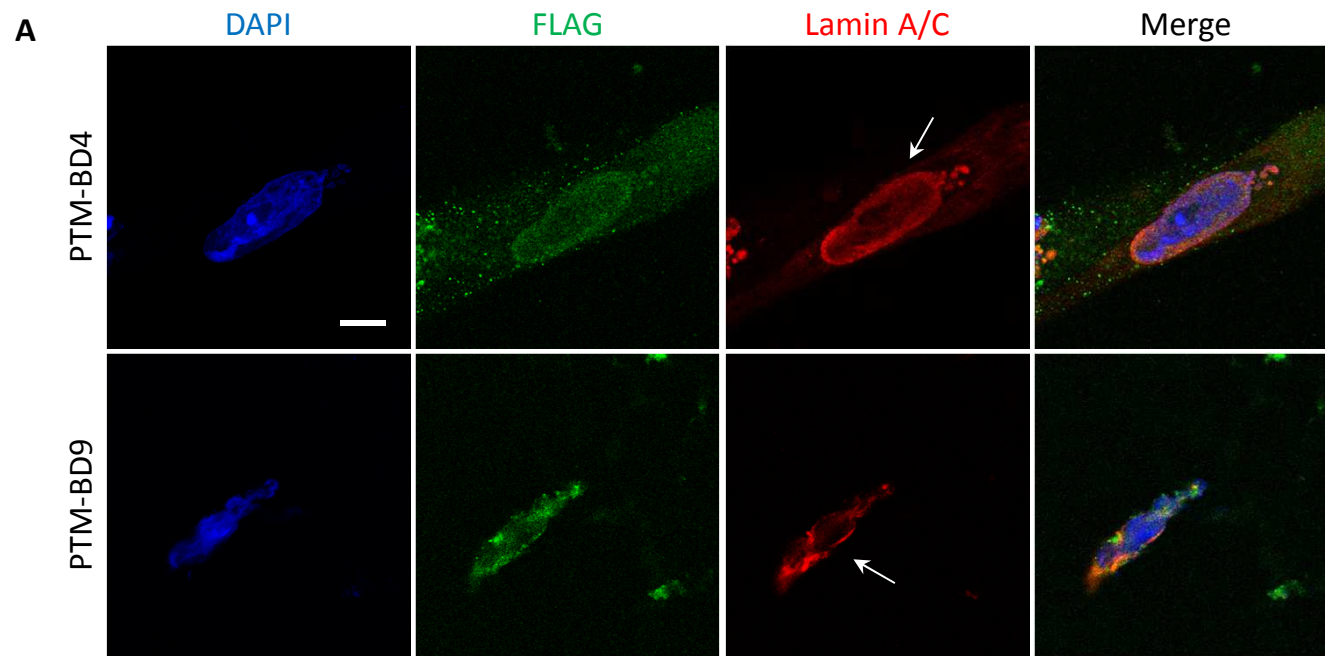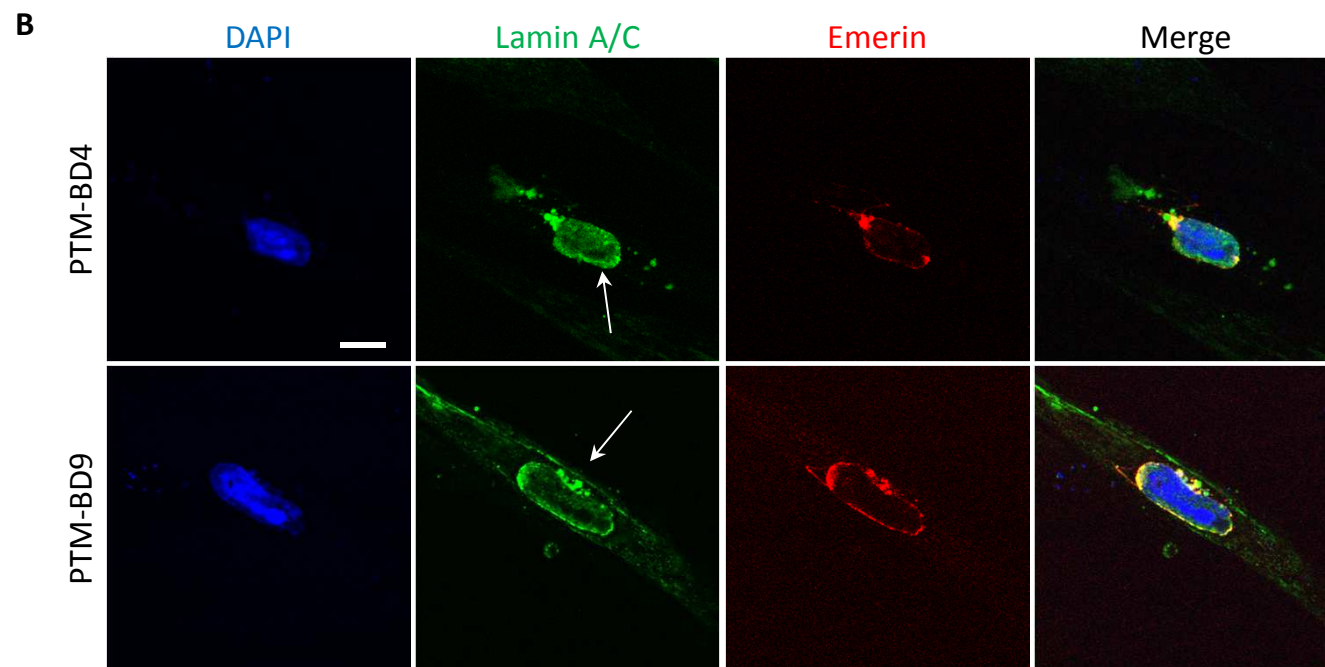

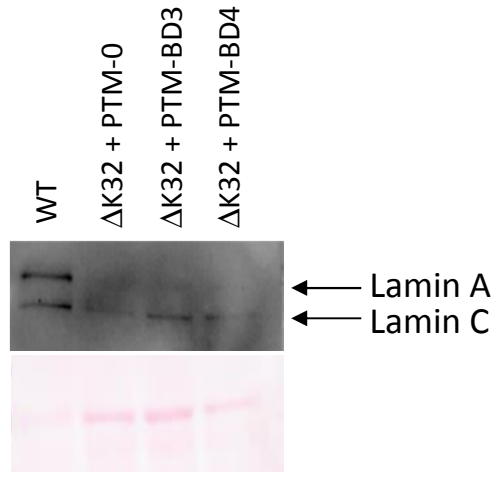

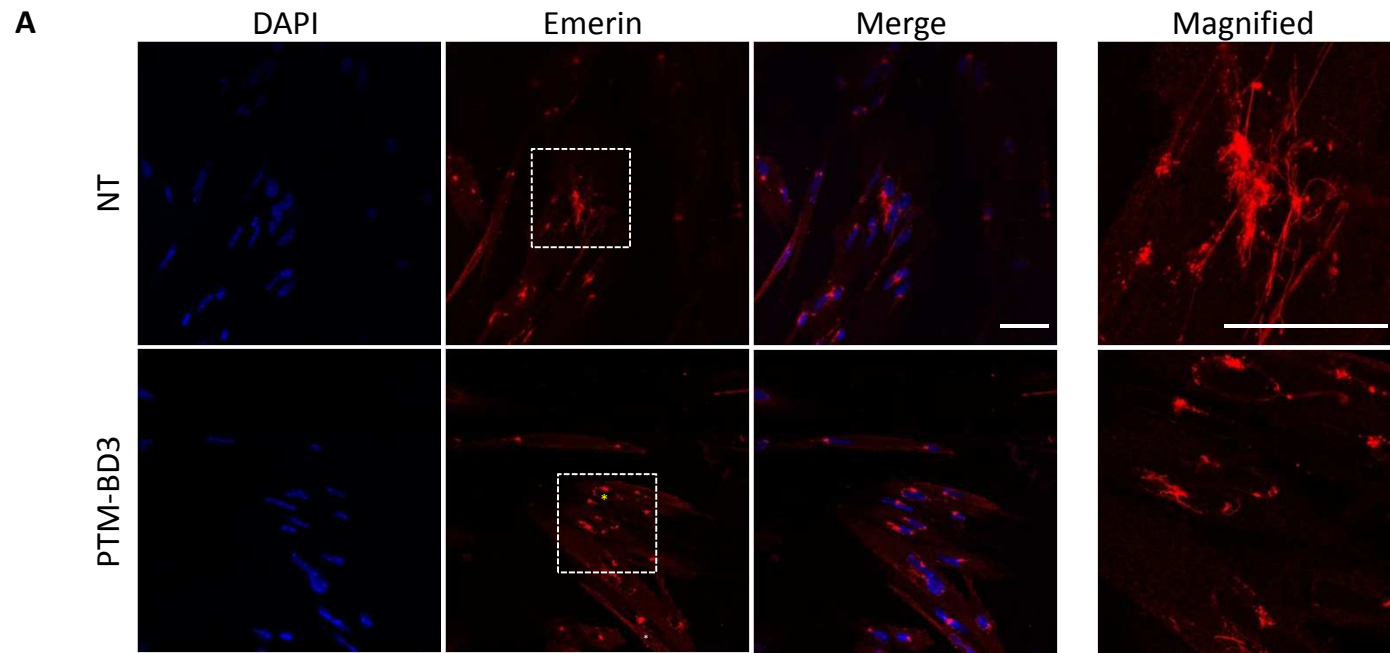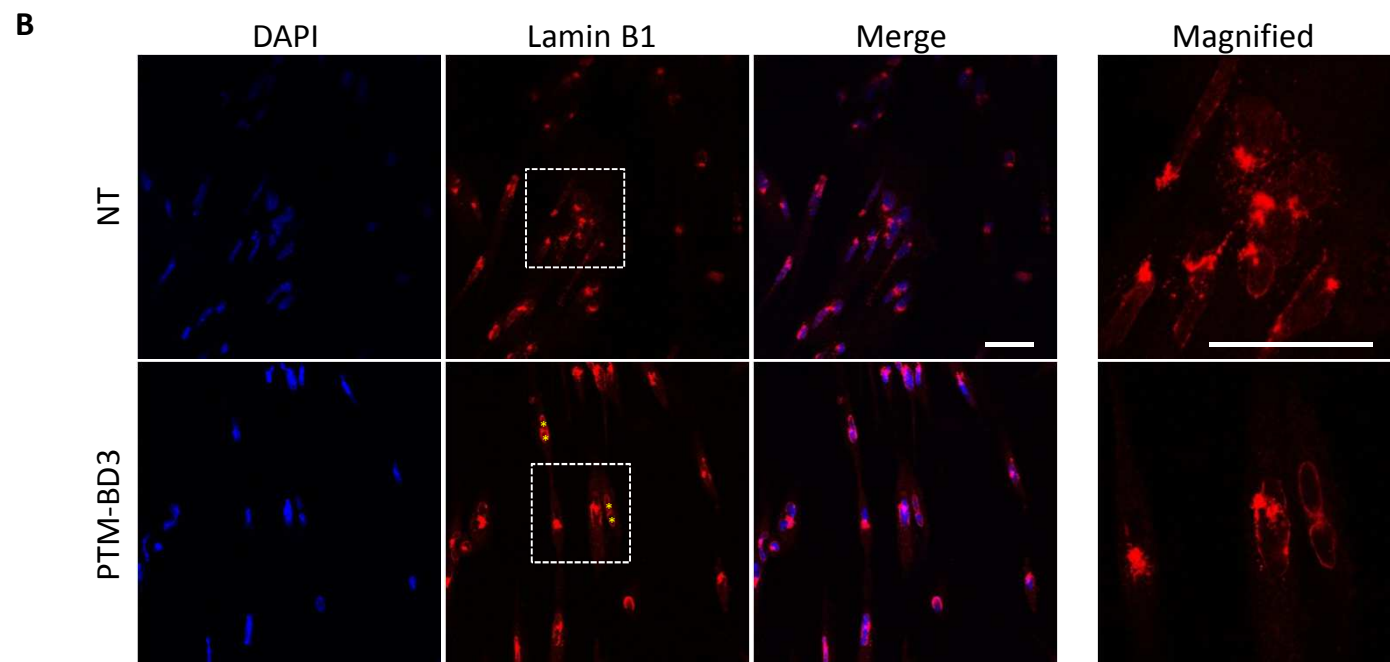

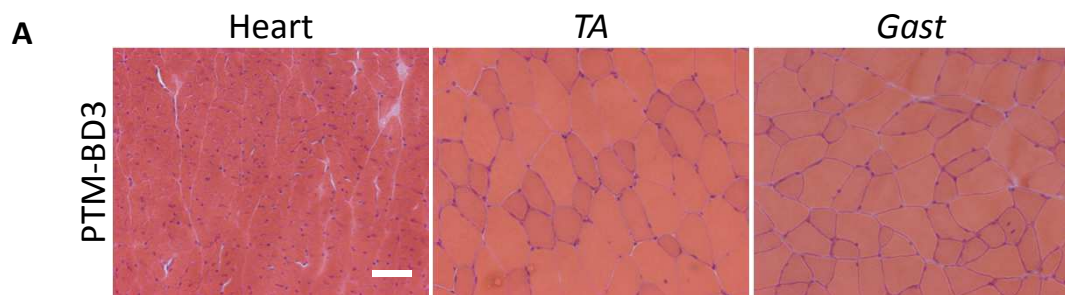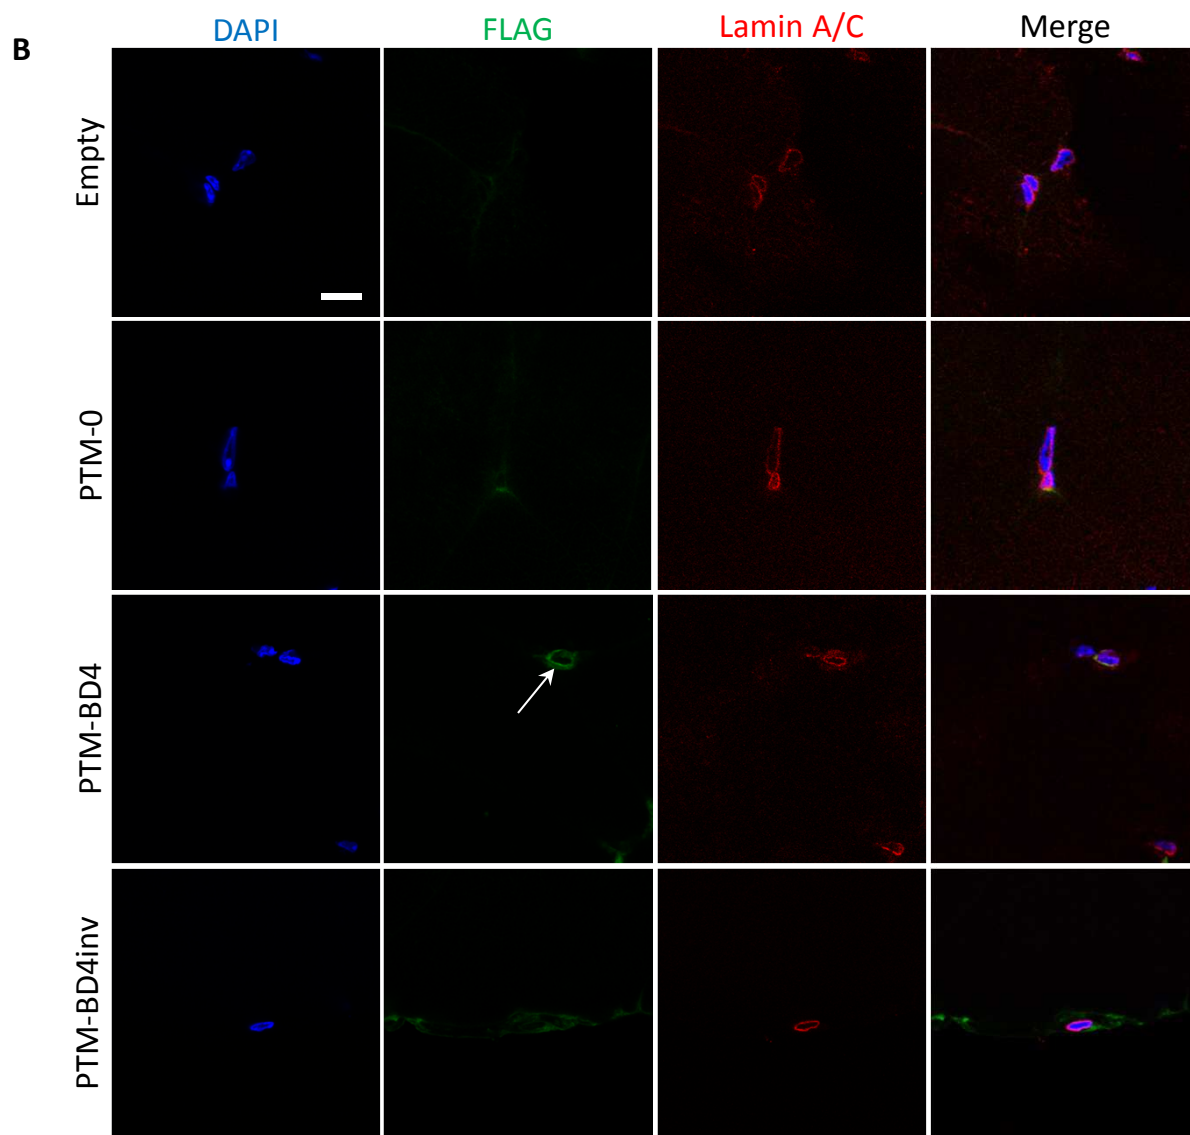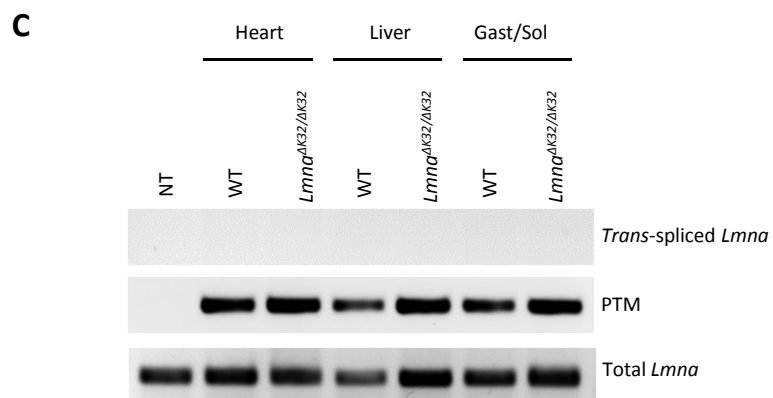

## Supplemental information

### **Figure S1: Protein evaluation of *trans*-splicing *in vitro*.**

(A) Representative western blot analysis for FLAG and lamin A/C expression relative to Ponceau red from C2C12 cells transfected or not (NT) with FLAG-prelaminA, various PTM-BD and PTM-BDinv. No trans-splicing event is detected by western blot. (B) Immunofluorescence analysis of C2C12 transfected with PTM-BD4 and PTM-BD9. Cells were double-stained with anti-FLAG (green) and anti-Lamin A/C (red) antibodies. Nuclei were stained with DAPI (blue). Arrows point on FLAG+ nuclei. (Scale bar: 10  $\mu$ m).

### **Figure S2: Evaluation of the transduction rate in mouse primary myotubes.**

Immunofluorescent confocal micrographs of WT mouse primary myotubes transduced with AAV2/9-CMV-GFP and stained for GFP (green) and Desmin (red). Nuclei were stained with DAPI (blue). (Scale bar: 100  $\mu$ m).

### **Figure S3: Detection of repaired *Lmna* mRNA induced by 5' *trans*-splicing in mouse**

***Lmna* <sup>$\Delta$ K32/ $\Delta$ K32</sup> primary myotubes.**

Immunofluorescence analysis of *Lmna* <sup>$\Delta$ K32/ $\Delta$ K32</sup> myotubes transduced with AAV2/9-PTM-BD4 and PTM-BD9. Cells were double-stained with anti-FLAG (green) and anti-lamin A/C (red) antibodies (A) or with anti-lamin A/C (green) and anti-emerin (red) antibodies (B). Nuclei were stained with DAPI (blue). Arrows show relocalization of lamin A/C to nuclear envelope. (Scale bar: 10  $\mu$ m).



**Figure S4: In vitro validation of *Lmna* 5' trans-splicing in primary mouse mutant myotubes.**

Western blot analysis for lamin A/C expression relative to Ponceau red from primary mouse WT myotubes and mutant ( $\Delta$ K32) myotubes transduced either with AAV2/9-PTM-0, -BD3 or -BD4. Transduction with AAV2/9-PTM-BD3 and -BD4 induces a small increase in lamin A/C protein level.

**Figure S5: Improve in emerin and lamin B1 localization after *Lmna* 5' trans-splicing in vitro.**

Immunofluorescence against emerin (**A**) or lamin B1 (**B**) in non-transduced (NT) or PTM-BD3-transduced primary mutant ( $\Delta$ K32) myotubes. Nuclei are counterstained with DAPI. Stars highlighted nuclei with corrected emerin or lamin B1 localization. Pictures on the right are a magnification of areas delimited with white dotted squares. (Scale bar: 50  $\mu$ m).

**Figure S6: Evaluation of trans-splicing efficiency in vivo.**

(**A**) Hematoxylin eosin staining of striated muscles sections from WT mice 50 days post-systemic injection with AAV2/9 expressing PTM-BD3. (Scale bar: 50  $\mu$ m). *TA*: *Tibialis anterior*; *Gast*: *Gastrocnemius*. (**B**) Immunofluorescence analysis of *Tibialis anterior* sections from WT mice 50 days post-systemic injection with AAV2/9-PTM-0, -PTM-BD4 and PTM-BD4inv. Cells were double-stained with anti-FLAG (green) and anti-Lamin A/C (red) antibodies. Nuclei were stained with DAPI (blue). (Scale bar: 10  $\mu$ m). (**C**) PCR analysis was performed with primers specific for trans-spliced *Lmna* (F-FLAG and R-*Lmna* exon 7), PTM (F-FLAG and R-*Lmna* exon 1) or total *Lmna* (F-*Lmna* exon 1 and R-*Lmna* exon 1) on RNA extracts from 15 days-old mouse heart, *Gastrocnemius* and liver after AAV2/9-PTM-BD4.

**Supplemental Table 1: Sequence of the different binding domains targeting intron 5 of *Lmna* pre-mRNA.**

|            |                                                                                                                                                                  |
|------------|------------------------------------------------------------------------------------------------------------------------------------------------------------------|
| <b>BD1</b> | CCCTGGAAAGCCAGACAGGCATCAGATTCAGAACCATAGCATGTGGTCCTGGAGTCCCTCCCCACCC<br>CCTTCTCAGTGGGCTTCTGCAGTATCTGCTTAGACCAGAGCCAAGGTGGGAGGGGTAAACTGAGGGTC<br>ACCTG             |
| <b>BD2</b> | CATGTCCAGTCCAAGGGAAGCTCTATCTCCAAGTAGGGAATGCGGCTGGGTTTGTAACTCAGTGAGAA<br>AGCACCTATCTACCAAGCAAGAGGCCTCTGGTTTCAGTCTCCGGCAGGCACAGAAGAAACATGAAAAAC<br>CCTTCATGCACA    |
| <b>BD3</b> | TCAGTGAGAAAGCACCTATCTACCAAGCAAGAGGCCTCTGGTTTCAGTCTCCGGCAGGCACAGAAGAAACATG<br>AAAAACCCCTTCATGCACAGTAAATAGAGGCCTCTGAGGATCAGGGCTAGCTAAAGGAGAGCCCTGGAAAGCC<br>AGACAG |
| <b>BD4</b> | AGTTAAGGGTGACCTTGAATCTCTGATACTCAACCTGAGATAAAAGGCATGCACCACCCAGTTCCTGTGG<br>TCCTGGGGATAGAAGCCAGGCCATCGTGTATAATAAGCAAGCACTGTACCAACTGAGCTACATGTCCAGTCC<br>AAGGGA     |
| <b>BD5</b> | CTGCCTCCCGAGTGCTGGGATTAAGGCCTGTGCTATTACAACCTGGCTTCTTTTCTTTCTTTTTGAGATA<br>AGGTCTGGTAGTCTAGGCTGGTCTCAAACCTGCTGTATAGTTAAGGGTGACCTTGAATCTCTGATACTTCAA<br>CCTGAG     |
| <b>BD6</b> | TGTTTGTGTTGTGGTATTTTGGTTTGGTTTGGTTTGGTTTTTCAAGACAGGGTTTCTCTGTATAGCCCTGG<br>CTGTCCGGAACTCACTTTGTAGACCAGGCTGGCCTCGAACTCAGAAATCCTCCTGCCTCTGCCTCCCGAGT<br>GCTGGG     |
| <b>BD7</b> | CACTGCAGTGTGCATGACAGACCTGGGAGTCCCGGAGGACAAGAATGTTTCATCATTTTCCACTTTTTTTTTTA<br>AGGATTTTTATTTATGTGTTGTTTGTGTTTGTGTTTGTGGTATTTTGGTTTGGTTTTTGGTTTTTCA<br>AGACAG      |
| <b>BD8</b> | TCTGTCTGAAACCTCTCATTCCGAGGCTAGACCCCATCTTCTTTTGTACAAAATAGTGTAGCTATTGTGAC<br>AAATAATATCGACACAAGTAACATTTCACTGCAGTGTGCATGACAGACCTGGGAGTCCCGGAGGACAAGAA<br>TGTTCA     |
| <b>BD9</b> | AAGGGCTGATGTCGATGAAGAGGGAGGGGCACAGGGGCAGGCAGAGGGACACTCAGGATCTGTAGGCTCTCT<br>CTAGAGCCACCATGGCCTTATCCAGTGACCAGGAAGCCCTTCTAATGTCTGTCTGAAACCTCTCATTCCGA<br>GGCTAG    |

**Supplemental Table 2: PCR primers used to amplify trans-spliced *Lmna* mRNA, total *Lmna* mRNA and PTM mRNA.**

| <b>Primer</b>        | <b>Sequence</b>         |
|----------------------|-------------------------|
| F-FLAG               | ATGGACTACAAGGACGACGA    |
| F- <i>Lmna</i> ex1   | GCCAGCTCTACCCCACTGT     |
| R- <i>Lmna</i> ex1   | CAGACTCAGTGATGCGAAGG    |
| F- <i>Lmna</i> ex2   | GGGACTTGTTGGCTGCGCA     |
| R- <i>Lmna</i> ex6-1 | TCCAGGGCCAGCTTGATGTCCAG |
| R- <i>Lmna</i> ex9-2 | CCATCTCTCGCTCTTTCTCA    |
| R- <i>Lmna</i> ex7   | CCGCACGAACTTTCCTCTT     |
